# Supplementary material for: SARS-CoV-2 Variants of Concern and Clinical Severity in the Mexican Pediatric Population
Source: MDPI journal article supplement (doi:10.3390/idr15050053), 2023-09-11
Supplement: s1 [file s1]

## Article

# SARS-CoV-2 Variants of Concern and Clinical Severity in the Mexican Pediatric Population

Anahí Maldonado-Cabrera <sup>1,2,†</sup> , Jesús Alejandro Colin-Vilchis <sup>3,†</sup>, Ubydul Haque <sup>4,5</sup> , Carlos Velazquez <sup>1</sup>, Andrea Socorro Alvarez Villaseñor <sup>6</sup>, Luis Eduardo Magdaleno-Márquez <sup>7</sup> , Carlos Iván Calleros-Muñoz <sup>8</sup>, Karen Fernanda Figueroa-Enríquez <sup>8</sup>, Aracely Angulo-Molina <sup>1,9,\*</sup> and Ana Lucía Gallego-Hernández <sup>1,\*</sup>

- <sup>1</sup> Department of Chemical Biological Sciences, University of Sonora, Hermosillo 83000, Mexico; a201203057@unison.mx (A.M.-C.); velaz2@unison.mx (C.V.)
- <sup>2</sup> Department of Epidemiology, Family Medicine Unit No. 37, Mexican Social Security Institute (IMSS), Hermosillo 83260, Mexico
- <sup>3</sup> Department of Medicine, Autonomous University of the Mexico State, Toluca 50000, Mexico; jcolinv859@alumno.uaemex.mx
- <sup>4</sup> Rutgers Global Health Institute, New Brunswick, NJ 08901, USA; uhaque@globalhealth.rutgers.edu
- <sup>5</sup> Department of Biostatistics and Epidemiology, School of Public Health, Rutgers University, Piscataway, NJ 08854, USA
- <sup>6</sup> Coordination of Medical Health Research, Mexican Social Security Institute (IMSS), La Paz 23920, Mexico; andrea.alvarez@imss.gob.mx
- <sup>7</sup> University Center for Biological and Agricultural Sciences, University of Guadalajara, Zapopan 44100, Mexico; eduardo.magdaleno@alumnos.udg.mx
- <sup>8</sup> Department of Agriculture, University of Sonora, Hermosillo 83323, Mexico; a219213704@unison.mx (C.I.C.-M.); a219218338@unison.mx (K.F.F.-E.)
- <sup>9</sup> School of Life Sciences, University of Applied Sciences and Arts Northwestern Switzerland, 4132 Muttenz, Switzerland
- \* Correspondence: aracely.angulomolina@fhnw.ch (A.A.-M.); ana.gallego@unison.mx (A.L.G.-H.)
- † These authors contributed equally to this work.

## Supplementary data

**Table S1.** Viral activity effects reported in high-frequency mutations associated with pediatric sequences in Mexico.

| Gen/Mutation        | Associated VOCs <sup>a</sup> | Effects in Viral Activity                                                |                                                                                     |                                                                  |
|---------------------|------------------------------|--------------------------------------------------------------------------|-------------------------------------------------------------------------------------|------------------------------------------------------------------|
|                     |                              | Transmissibility                                                         | Immunity                                                                            | Severity                                                         |
| <b>Envelope</b>     |                              |                                                                          |                                                                                     |                                                                  |
| T9I                 | o                            |                                                                          |                                                                                     | Virulence decreased [41]                                         |
| <b>Nucleocapsid</b> |                              |                                                                          |                                                                                     |                                                                  |
| P13L                | o                            |                                                                          | Decreased T cell recognition [42]                                                   | Decreased pathogenicity [43,44]                                  |
| <b>Spike</b>        |                              |                                                                          |                                                                                     |                                                                  |
| T478K               | δ o                          | Increase ACE2 affinity [45]<br>Increased potential transmission [46]     | Reduced affinity and antibody response [47,48]<br>Increased antibody escape [45,49] | Increase virulence [45]<br>Increased severity [50]               |
| P681H               | α o                          | Increase ACE2 binding [51]<br>Increase infectivity and transmission [52] | Reduced affinity and antibody response [53,54]                                      | Increase virulence [55]<br>Increase replication, viral load [42] |
| G142D               | o                            |                                                                          | Decrease antibody binding [41]                                                      |                                                                  |
| H655Y               | γ o                          | Increase ACE2 binding [51]                                               |                                                                                     |                                                                  |
| L452R               | δ o                          |                                                                          | Reduced affinity and antibody response [47]                                         |                                                                  |
| N679K               | o                            | Increase ACE2 binding [51]                                               |                                                                                     |                                                                  |
| N969K               | o                            | Decrease infectivity [56]                                                |                                                                                     |                                                                  |
| Q954H               | o                            | Decrease infectivity [56]                                                |                                                                                     |                                                                  |
| N764K               | o                            |                                                                          |                                                                                     | Increase virulence [57]                                          |
| G339D               | o                            |                                                                          | Increase antibody escape [58]                                                       |                                                                  |
| S375F               | o                            | Increase potential transmission [46]                                     | Increase antibody escape [58]                                                       |                                                                  |
| S373P               | o                            | Increase potential transmission [46]                                     | Increase antibody escape [58]                                                       |                                                                  |
| N501Y               | α β γ o                      | Increase infectivity and transmission [46,58]                            | Reduced affinity and antibody response [47,58]                                      |                                                                  |

<sup>a</sup> Variants of Concern (α) Alpha, (β) Beta, (γ) Gamma, (δ) Delta, and (o) Omicron.

## D. Spike protein

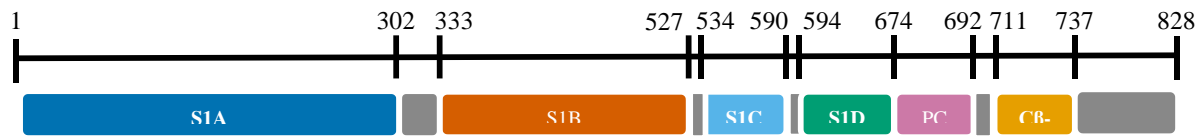

## C. Nucleocapsid protein

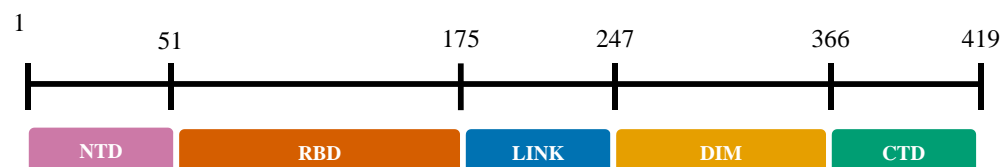

## B. Envelope protein

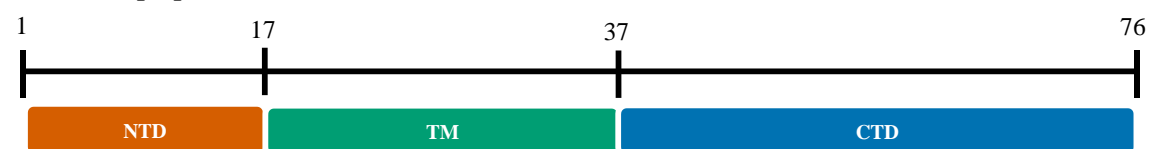

## A. Membrane protein

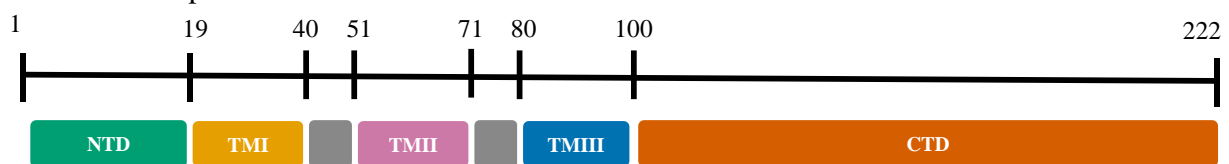

**Figure S1.** A schematic illustration of the structural proteins of SARS-CoV-2. **(A)** S protein; (S1A) S1A domain, (S1B) S1B domain, (S1C) S1C Domain, (S1D) S1D domain, (PCS) protease cleavage site, (C $\beta$ S) Central  $\beta$ -strand. **(B)** N protein; (NTD) N-Terminal, (RBD) Receptor Binding domain, (LINK) Predicted central linker, (DIM) Dimerization domain, (CTD) C-Terminal. **(C)** E protein; (NTD) N-Terminal, (TM) Transmembrane (CTD) C-Terminal. **(D)** M protein; (NTD) N-Terminal, (TMI) Transmembrane I domain, (TMII) Transmembrane II domain, (TMIII) Transmembrane III domain, (CTD) C-Terminal.

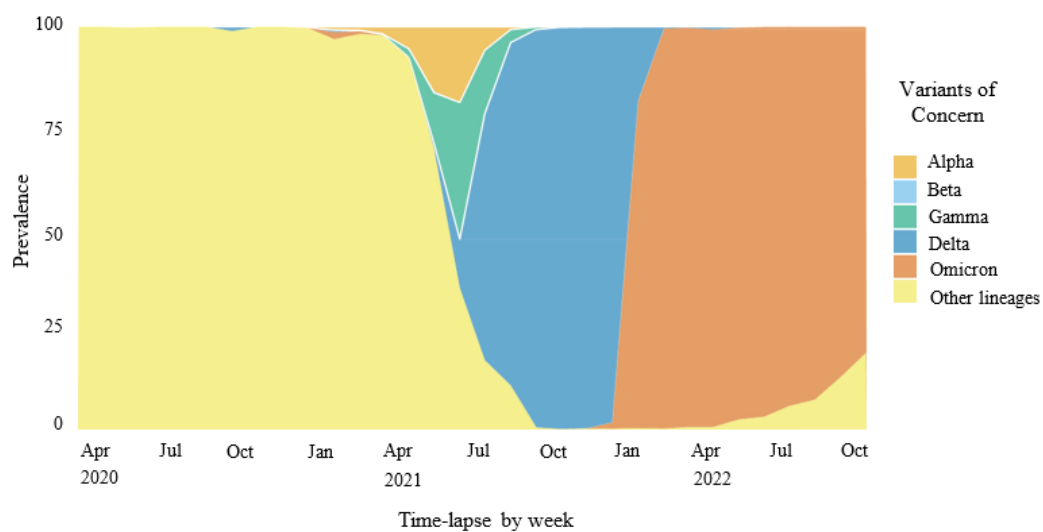

**Figure S2.** Analysis of prevalence distribution across Variants of concern (VOCs) in Mexico ( $n = 75,348$ ).

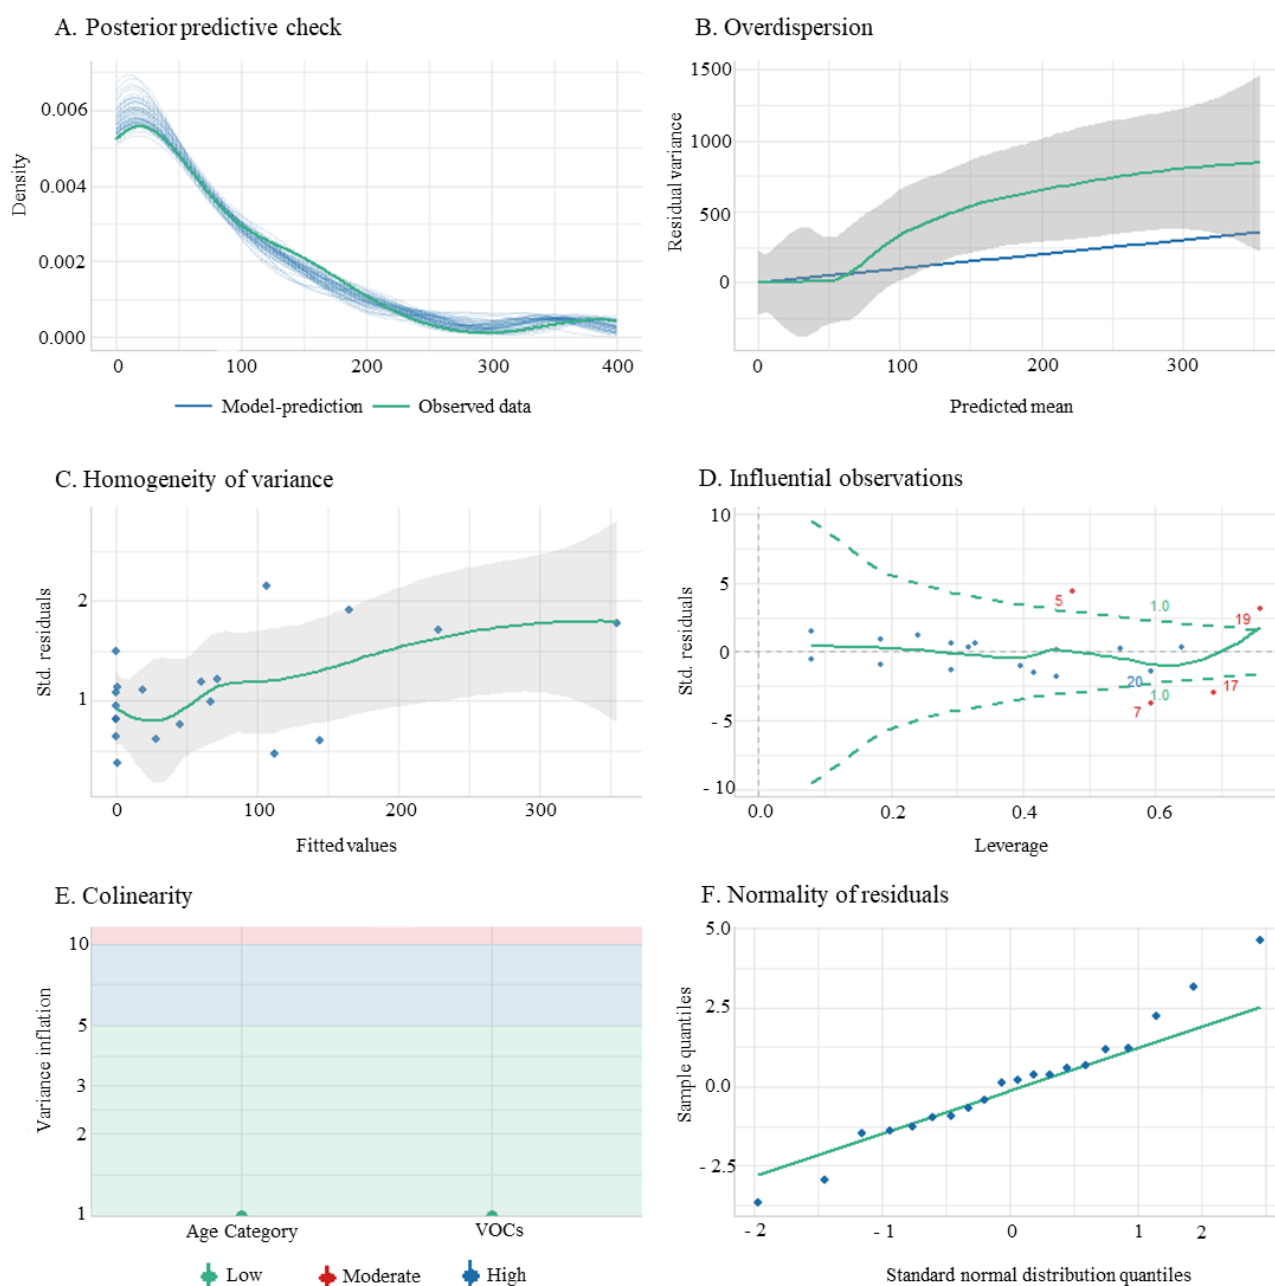

**Figure S3.** Evaluations assessments plots for the clinical pediatric severity logistics models. **(A)** Posterior predictive check; model-predicted lines should resemble observed data line. **(B)** Overdispersion and zero-inflation; observed residual variance (green line) should follow predicted residual variance (blue line). **(C)** Homogeneity of variance; reference line should be flat and horizontal. **(D)** Influential observations; points should be inside the contour lines. **(E)** Collinearity; High collinearity (VIF) may inflate parameter uncertainty. **(F)** Normality of residuals; dots should fall along the line.
